# Supplementary material
Source: publisher figshare collection journal article supplement (https://acs.figshare.com/ndownloader/files/5867871)
Supplement: Supplementary file 1 [file 5867871]

## Supporting Information

### **Disiloxane-protected 2-deoxyribonolactone as an efficient precursor to 1,2-dideoxy-1- $\beta$ -aryl-D-ribofuranoses**

Uthai Wichai and Stephen A. Woski\*

Department of Chemistry and Coalition for Biomolecular Products

The University of Alabama, Tuscaloosa, AL 35487-0336

swoski@bama.ua.edu

**General Experimental:** All solvents and reagents were purchased from commercial sources. THF was dried over and distilled from sodium/benzophenone ketyl immediately prior to use. DMF was dried over and distilled at reduced pressure from  $\text{CaH}_2$ . All other materials were used as received from the vendor.  $^1\text{H}$  NMR spectra were recorded at 360 MHz and  $^{13}\text{C}$  NMR spectra were recorded at 90 MHz using a Bruker AM-360 spectrometer. Chemical shifts are reported in ppm from an internal reference, tetramethylsilane. Ratios of anomers ( $\beta:\alpha$ ) were determined by integration of resolved peaks in the  $^1\text{H}$  NMR spectrum of the mixed material. Assignments of the anomeric stereochemistry for compounds **3a-g** were confirmed by NOE experiments. High resolution mass spectra were recorded using a VG Autospec Mass Spectrometer operating in EI mode (70 eV).

#### **3,5-*O*-((1,1,3,3-tetraisopropyl)disiloxanediyl)-2-deoxy-D-ribo-1,4-lactone (2b)**

To a solution of 2-deoxy-D-ribose (1.00 g, 7.45 mmol) in water (6 mL) was added  $\text{Br}_2$  (2 mL). The flask was sealed, and the contents were stirred at room temperature for 5 d. The resulting mixture was neutralized by adding  $\text{Ag}_2\text{CO}_3$  until the pH of solution was 7.0. The mixture was filtered, and the filtrate was concentrated under reduced pressure at 40 °C to yield 2-deoxyribonolactone as a yellow oil.

Without further purification, the crude oil was dissolved in 20 mL of anhydrous DMF, and imidazole (1.27 g, 18.6 mmol) and 1,3-dichloro-1,1,3,3-tetraisopropyldisiloxane (5.84 mL,

11.2 mmol) were added. The resulting solution was stirred at the room temperature for 24 h, and extracted with ether. The organic layer was washed with water, saturated aqueous NaHCO<sub>3</sub>, and brine, was dried over anhydrous Na<sub>2</sub>SO<sub>4</sub>, and was concentrated *in vacuo*. Flash chromatography of the crude product (silica gel, CH<sub>2</sub>Cl<sub>2</sub>) produced the desired product as a colorless oil (2.42 g, 86%).

<sup>1</sup>H NMR (CDCl<sub>3</sub>) δ 4.67-4.59 (m, 1H, H-3), 4.21 (app dt, 1H, *J* = 3.6, 6.7 Hz, H-4), 4.14 (dd, 1H *J* = 12.3, 3.6 Hz, H-5), 3.92 (dd, 1H, *J* = 12.3, 6.7 Hz, H-5), 2.85 (dd, 1H, *J* = 17.3, 8.0 Hz, H-2), 2.70 (dd, 1H, *J* = 17.3, 9.2 Hz, H-2), 1.13-1.00 (m, 28H, 4 × -CH(CH<sub>3</sub>)<sub>2</sub>). <sup>13</sup>C NMR (CDCl<sub>3</sub>) δ 173.0, 84.8, 69.7, 62.3, 37.8, 17.4, 17.3, 17.1, 17.0, 16.85, 16.8, 13.3, 13.1, 12.8, 12.5.

#### **General Procedure for Synthesis of 3,5-O-((1,1,3,3-tetraisopropyl)disiloxanediyl)-1,2-dideoxy-β-1-aryl-D-ribofuranoses (3a-g)**

To a solution of the bromoarene (~1 mmol) in anhydrous THF (2.5 mL) under N<sub>2</sub> and at -78 °C was added *n*-BuLi (~1.8 M in hexanes, 1.0 eq). The mixture was stirred at -78 °C for 30 min and was then added via cannula to a solution of **2b** (0.22 g, 0.64 mmol) in anhydrous THF (2.5 mL) at -78 °C. After 1 h, the reaction mixture was quenched at -78 °C with sat. aqueous NH<sub>4</sub>Cl and was then extracted with diethyl ether. The combined ether phases were washed with sat. aqueous NH<sub>4</sub>Cl, water, and brine, and were dried over anhydrous Na<sub>2</sub>SO<sub>4</sub>. Concentration *in vacuo* produced an oil that was used without further purification.

A solution of the crude oil in CH<sub>2</sub>Cl<sub>2</sub> (2.5 mL) under N<sub>2</sub> and at -78 °C was treated with Et<sub>3</sub>SiH (3 equiv.) and BF<sub>3</sub>•OEt<sub>2</sub> (3 equiv.). The resulting solution was stirred at -78 °C for 6 h, and then the reaction was quenched at -78 °C by the addition of sat NaHCO<sub>3</sub>. The resulting mixture was extracted with diethyl ether. The combined organic phases were washed with sat. NaHCO<sub>3</sub>, water, and brine. This solution was dried over anhydrous Na<sub>2</sub>SO<sub>4</sub> and was concentrated *in vacuo*. Flash chromatography of the crude product (silica gel, toluene) yielded the desired compound as an oil.

**3,5-O-((1,1,3,3-tetraisopropyl)disiloxanediyl)-1,2-dideoxy- $\beta$ -1-phenyl-D-ribofuranose (3a, total yield 56%, 11:1  $\beta/\alpha$ )**

$^1\text{H}$  NMR ( $\text{CDCl}_3$ )  $\delta$  7.34-7.30 (m, 5H), 5.09 (app t, 1H,  $J = 7.3$  Hz, H-1), 4.55-4.51 (m, 1H, H-3), 4.14 (br d, 1H,  $J = 8.3$  Hz, H-5), 3.93-3.85 (m, 2H, H-4/H-5), 2.37 (ddd, 1H,  $J = 12.8, 7.0, 4.5$  Hz, H-2 $_{\alpha}$ ), 2.08 (app dt, 1H,  $J = 12.8, 7.8$  Hz, H-2 $_{\beta}$ ), 1.09-1.02 (m, 28H, 4  $\times$  -CH(CH $_3$ ) $_2$ ).  $^{13}\text{C}$  NMR ( $\text{CDCl}_3$ )  $\delta$  142.0, 128.3, 127.5, 125.8, 86.4, 79.1, 73.4, 63.8, 43.2, 17.6, 17.4, 17.3, 17.1, 17.0, 13.5, 13.4, 13.0, 12.6. HRMS: Calcd for  $\text{C}_{20}\text{H}_{33}\text{O}_4\text{Si}_2$  ([M-isopropyl] $^+$ )  $m/z$  393.1917, found  $m/z$  393.1932.

**3,5-O-((1,1,3,3-tetraisopropyl)disiloxanediyl)-1,2-dideoxy- $\beta$ -1-(4-methylphenyl)-D-ribofuranose (3b, total yield 24%, 28:1  $\beta/\alpha$ )**

$^1\text{H}$  NMR ( $\text{CDCl}_3$ )  $\delta$  7.23 (d, 2H,  $J = 8.0$  Hz), 7.13 (d, 2H,  $J = 8.0$  Hz), 5.05 (app t, 1H,  $J = 7.4$  Hz, H-1), 4.55-4.50 (m, 1H, H-3), 4.13 (dd, 1H  $J = 10.3, 2.4$  Hz, H-5), 3.93-3.83 (m, 2H, H-4/H-5), 2.37-2.27 (m, 1H, H-2 $_{\alpha}$ ), 2.31 (s, 3H, CH $_3$ ), 2.06 (app dt, 1H,  $J = 12.9, 7.9$ , H-2 $_{\beta}$ ), 1.09-1.02 (m, 28H, 4  $\times$  -CH(CH $_3$ ) $_2$ ).  $^{13}\text{C}$  NMR ( $\text{CDCl}_3$ )  $\delta$  139.0, 137.1, 129.0, 125.8, 86.4, 79.0, 73.6, 63.89, 43.2, 21.1, 17.6, 17.45, 17.4, 17.3, 17.12, 17.1, 17.0, 13.5, 13.4, 13.0, 12.6. HRMS: Calcd for  $\text{C}_{21}\text{H}_{35}\text{O}_4\text{Si}_2$  ([M-isopropyl] $^+$ )  $m/z$  407.2073, found  $m/z$  407.2056.

**3,5-O-((1,1,3,3-tetraisopropyl)disiloxanediyl)-1,2-dideoxy- $\beta$ -1-(3-methylphenyl)-D-ribofuranose (3c, total yield 35%, 15:1  $\beta/\alpha$ )**

$^1\text{H}$  NMR ( $\text{CDCl}_3$ )  $\delta$  7.21 (t, 1H,  $J = 7.5$  Hz), 7.15 (s, 1H), 7.12 (d, 1H,  $J = 7.5$  Hz), 7.06 (d, 1H,  $J = 7.3$  Hz), 5.05 (app t, 1H,  $J = 7.4$  Hz, H-1), 4.55-4.51 (m, 1H, H-3), 4.17-4.11 (m, 1H, H-5), 3.92-3.85 (m, 2H, H-4/H-5), 2.38-2.31 (m, 1H, H-2 $_{\alpha}$ ), 2.33 (s, 3H, CH $_3$ ), 2.08 (app dt, 1H,  $J = 12.8, 7.9$  Hz, H-2 $_{\beta}$ ), 1.10-1.01 (m, 28H, 4  $\times$  -CH(CH $_3$ ) $_2$ ).  $^{13}\text{C}$  NMR ( $\text{CDCl}_3$ )  $\delta$  141.9, 138.0, 128.2, 126.5, 123.0, 86.4, 79.1, 73.4, 63.8, 43.1, 21.4, 17.6, 17.5, 17.42, 17.4, 17.2, 17.1, 17.07, 17.0, 13.5, 13.4, 13.0, 12.6. HRMS: Calcd for  $\text{C}_{21}\text{H}_{35}\text{O}_4\text{Si}_2$  ([M-isopropyl] $^+$ )  $m/z$  407.2073, found  $m/z$  407.2086.

**3,5-O-((1,1,3,3-tetraisopropyl)disiloxanediyl)-1,2-dideoxy- $\beta$ -1-(2-methylphenyl)-D-ribofuranose (3d, total yield 17%, 6.5:1  $\beta/\alpha$ )**

$^1\text{H}$  NMR ( $\text{CDCl}_3$ )  $\delta$  7.51-7.49 (m, 1H), 7.21-7.10 (m, 3H), 5.25 (app t, 1H,  $J = 7.3$  Hz, H-1), 4.53-4.48 (m, 1H, H-3), 4.15 (dd, 1H,  $J = 11.8, 3.4$  Hz, H-5), 3.95 (dd, 1H,  $J = 11.8, 6.6$  Hz, H-5), 3.99-3.84 (m, 1H, H-4), 2.40 (ddd, 1H,  $J = 12.6, 7.5, 5.3$  Hz, H-2 $_{\alpha}$ ), 2.30 (s, 3H, CH<sub>3</sub>), 1.99 (app dt, 1H,  $J = 12.6, 7.5$  Hz, H-2 $_{\beta}$ ), 1.13-0.92 (m, 28H, 4  $\times$  -CH(CH<sub>3</sub>)<sub>2</sub>).  $^{13}\text{C}$  NMR ( $\text{CDCl}_3$ )  $\delta$  140.7, 134.2, 130.0, 127.0, 126.1, 124.7, 85.6, 75.9, 72.6, 63.2, 41.6, 19.1, 17.6, 17.4, 17.37, 17.2, 17.1, 17.0, 13.5, 13.3, 13.0, 12.6. HRMS: Calcd for C<sub>21</sub>H<sub>35</sub>O<sub>4</sub>Si<sub>2</sub> ([M-isopropyl]<sup>+</sup>)  $m/z$  407.2073, found  $m/z$  407.2098.

**3,5-O-((1,1,3,3-tetraisopropyl)disiloxanediyl)-1,2-dideoxy- $\beta$ -1-(3,5-dimethylphenyl)-D-ribofuranose (3e, total yield 34%, 11:1  $\beta/\alpha$ )**

$^1\text{H}$  NMR ( $\text{CDCl}_3$ )  $\delta$  6.95 (s, 2H), 6.89 (s, 1H), 5.02 (app t, 1H,  $J = 7.4$  Hz, H-1), 4.55-4.50 (m, 1H, H-3), 4.17-4.11 (m, 1H, H-5), 3.92-3.86 (m, 2H, H-4/H-5), 2.37-2.30 (m, 1H, H-2 $_{\alpha}$ ), 2.30 (s, 6H, CH<sub>3</sub>), 2.08 (app dt, 1H,  $J = 12.8, 7.9$  Hz, H-2 $_{\beta}$ ) 1.12-0.93 (m, 28H, 4  $\times$  -CH(CH<sub>3</sub>)<sub>2</sub>).  $^{13}\text{C}$  NMR ( $\text{CDCl}_3$ )  $\delta$  141.9, 137.9, 129.1, 123.6, 86.4, 79.2, 73.4, 63.7, 43.0, 21.3, 17.6, 17.5, 17.4, 17.3, 17.1, 17.09, 17.0, 13.5, 13.4, 13.0, 12.6. HRMS: Calcd for C<sub>22</sub>H<sub>37</sub>O<sub>4</sub>Si<sub>2</sub> ([M-isopropyl]<sup>+</sup>)  $m/z$  421.2230, found  $m/z$  421.2241.

**3,5-O-((1,1,3,3-tetraisopropyl)disiloxanediyl)-1,2-dideoxy- $\beta$ -1-(2-naphthyl)-D-ribofuranose (3f, total yield 38%, 10:1  $\beta/\alpha$ )**

$^1\text{H}$  NMR ( $\text{CDCl}_3$ )  $\delta$  7.83-7.81 (m, 4H), 7.48-7.43 (m, 3H), 5.28 (app t, 1H,  $J = 7.3$  Hz, H-1), 4.62-4.57 (m, 1H, H-3), 4.23-4.17 (m, 1H, H-5), 4.00-3.93 (m, 2H, H-4/H-5), 2.49-2.42 (m, 1H, H-2 $_{\alpha}$ ), 2.17 (app dt, 1H,  $J = 12.8, 7.7$  Hz, H-2 $_{\beta}$ ) 1.12-1.02 (m, 28H, 4  $\times$  -CH(CH<sub>3</sub>)<sub>2</sub>).  $^{13}\text{C}$  NMR ( $\text{CDCl}_3$ )  $\delta$  139.6, 133.3, 132.9, 128.2, 127.9, 127.6, 126.0, 125.7, 124.4, 124.0, 86.4, 79.1, 73.2, 63.6, 43.1, 17.6, 17.5, 17.45, 17.4, 17.2, 17.1, 17.0, 13.5, 13.4, 13.0, 12.6. HRMS: Calcd for C<sub>24</sub>H<sub>35</sub>O<sub>4</sub>Si<sub>2</sub> ([M-isopropyl]<sup>+</sup>)  $m/z$  443.2073, found  $m/z$  443.2094.

**3,5-*O*-((1,1,3,3-tetraisopropyl)disiloxanediyl)-1,2-dideoxy- $\beta$ -1-(1-naphthyl)-D-ribofuranose (3g, total yield 34%, 11:1  $\beta/\alpha$ )**

$^1\text{H}$  NMR ( $\text{CDCl}_3$ )  $\delta$  7.93 (br d, 1H,  $J = 7.8$  Hz), 7.88-7.86 (m, 1H), 7.77-7.75 (m, 2H), 7.54-7.43 (m, 3H), 5.82 (app t, 1H,  $J = 7.1$  Hz, H-1), 4.55 (m, 1H, H-3), 4.21 (dd, 1H,  $J = 12.0, 3.5$  Hz H-5), 4.06 (dd, 1H,  $J = 12.0, 6.0$  Hz, H-5), 4.00-3.96 (m, 1H, H-4), 2.67-2.59 (ddd, 1H,  $J = 12.5, 7.5, 5.9$  Hz, H-2 $_{\alpha}$ ), 2.23-2.16 (app dt, 1H,  $J = 12.5, 7.1$  Hz, H-2 $_{\beta}$ ), 1.12-0.98 (m, 28H, 4  $\times$  -CH(CH<sub>3</sub>)<sub>2</sub>).  $^{13}\text{C}$  NMR ( $\text{CDCl}_3$ )  $\delta$  138.3, 133.6, 130.1, 128.8, 127.6, 125.9, 125.5, 125.4, 123.1, 122.2, 85.5, 75.8, 72.2, 62.9, 42.1, 17.6, 17.5, 17.4, 17.2, 17.1, 17.08, 17.0, 13.5, 13.4, 13.0, 12.6. HRMS: Calcd for C<sub>24</sub>H<sub>35</sub>O<sub>4</sub>Si<sub>2</sub> ([M-isopropyl]<sup>+</sup>)  $m/z$  443.2079, found  $m/z$  443.2084.

**General Procedure for Removal of Disiloxane Group**

To a solution of the disiloxane (~0.1 mmol) in anhydrous THF (2 mL) was added Bu<sub>4</sub>N<sup>+</sup>F<sup>-</sup> (1 M in THF, 3.0 eq). The resulting mixture was stirred at the room temperature for 3 h, and then 5% aqueous NH<sub>4</sub>HCO<sub>3</sub> solution was added to quench the reaction. The mixture was extracted with diethyl ether, and the combined organic extracts were washed with 5% aqueous NH<sub>4</sub>HCO<sub>3</sub>, water, and brine. The organic portion was dried over anhydrous Na<sub>2</sub>SO<sub>4</sub> and concentrated *in vacuo* to give the crude product as white solid. The crude material was purified using flash column chromatography (silica gel, 19:1 CH<sub>2</sub>Cl<sub>2</sub>/MeOH).

**1,2-dideoxy- $\beta$ -1-phenyl-D-ribofuranose<sup>1</sup> (1a, 70% isolated yield)**

$^1\text{H}$  NMR (1:1 CDCl<sub>3</sub>/CD<sub>3</sub>OD)  $\delta$  7.39-7.24 (m, 5H), 5.15 (dd, 1H,  $J = 10.3, 5.4$  Hz, H-1), 4.35-4.33 (m, 1H, H-3), 3.98 (dt, 1H,  $J = 2.5, 5.1$  Hz, H-4), 3.76-3.65 (m, 2H, H-5), 2.22 (ddd, 1H,  $J = 13.1, 5.3, 1.6$  Hz, H-2), 1.99 (ddd, 1H,  $J = 13.1, 10.5, 6.0$  Hz, H-2).  $^{13}\text{C}$  NMR (1:1 CDCl<sub>3</sub>/CD<sub>3</sub>OD)  $\delta$  141.0, 127.7, 127.0, 125.4, 87.2, 79.8, 72.6, 62.4, 43.0. HRMS: Calcd for C<sub>11</sub>H<sub>14</sub>O<sub>3</sub>  $m/z$  194.0943, found  $m/z$  194.0934.

**1,2-dideoxy- $\beta$ -1-(4-methylphenyl)-D-ribofuranose (1b, 66% isolated yield)**

$^1\text{H}$  NMR (1:1  $\text{CDCl}_3/\text{CD}_3\text{OD}$ )  $\delta$  7.26 (d, 2H,  $J = 7.8$  Hz), 7.15 (d, 2H,  $J = 7.8$  Hz), 5.10 (dd, 1H,  $J = 10.3, 5.4$  Hz, H-1), 4.35-4.33 (m, 1H, H-3), 3.98-3.95 (m, 1H, H-4), 3.74-3.64 (m, 2H, H-5), 2.33 (s, 3H,  $\text{CH}_3$ ), 2.22-2.17 (m, 1H, H-2), 2.02-1.98 (m, 1H, H-2).  $^{13}\text{C}$  NMR (1:1  $\text{CDCl}_3/\text{CD}_3\text{OD}$ )  $\delta$  137.8, 136.8, 128.4, 125.5, 87.1, 79.7, 72.6, 62.4, 42.9, 20.1. HRMS: Calcd for  $\text{C}_{12}\text{H}_{16}\text{O}_3$   $m/z$  208.1099, found  $m/z$  208.1074.

**1,2-dideoxy- $\beta$ -1-(3-methylphenyl)-D-ribofuranose (1c, 74% isolated yield)**

$^1\text{H}$  NMR (1:1  $\text{CDCl}_3/\text{CD}_3\text{OD}$ )  $\delta$  7.24-7.13 (m, 3H), 7.09 (d, 1H,  $J = 7.2$  Hz), 5.12 (dd, 1H,  $J = 10.4, 5.4$  Hz, H-1), 4.34-4.33 (m, 1H, H-3), 3.97 (app dt, 1H,  $J = 2.6, 5.2$  Hz, H-4), 3.72 & 3.68 (AB part of ABX, 2H,  $J_{AB} = 11.6$  Hz,  $J_{AX} = 5.2$  Hz,  $J_{BX} = 5.4$  Hz, H-5), 2.34 (s, 3H,  $\text{CH}_3$ ), 2.22 (ddd, 1H,  $J = 13.3, 5.5, 1.6$  Hz, H-2), 1.99 (ddd, 1H,  $J = 13.3, 10.4, 6.0$  Hz, H-2).  $^{13}\text{C}$  NMR (1:1  $\text{CDCl}_3/\text{CD}_3\text{OD}$ )  $\delta$  140.8, 137.4, 127.8, 127.7, 126.1, 122.5, 87.1, 79.8, 72.6, 62.4, 42.9, 20.4. HRMS: Calcd for  $\text{C}_{12}\text{H}_{16}\text{O}_3$   $m/z$  208.1099, found  $m/z$  208.1073.

**1,2-dideoxy- $\beta$ -1-(2-methylphenyl)-D-ribofuranose (1d, 67% isolated yield)**

$^1\text{H}$  NMR (1:1  $\text{CDCl}_3/\text{CD}_3\text{OD}$ )  $\delta$  7.51 (d, 1H,  $J = 6.9$  Hz), 7.21-7.11 (m, 3H), 5.37 (dd, 1H,  $J = 10.2, 5.4$  Hz, H-1), 4.35-4.33 (m, 1H, H-3), 3.99-3.95 (m, 1H, H-4), 3.76 & 3.71 (AB part of ABX, 2H,  $J_{AB} = 11.6$  Hz,  $J_{AX} = 5.3$  Hz,  $J_{BX} = 5.4$  Hz, H-5), 2.30 (s, 3H,  $\text{CH}_3$ ), 2.28 (ddd, 1H,  $J = 13.2, 5.4, 1.8$  Hz, H-2), 1.88 (ddd, 1H,  $J = 13.2, 10.3, 6.2$  Hz, H-2).  $^{13}\text{C}$  NMR (1:1  $\text{CDCl}_3/\text{CD}_3\text{OD}$ )  $\delta$  139.2, 134.1, 129.5, 126.6, 125.5, 124.2, 86.7, 76.4, 72.6, 62.4, 41.5, 18.1. HRMS: Calcd for  $\text{C}_{12}\text{H}_{16}\text{O}_3$   $m/z$  208.1099, found  $m/z$  208.1104.

**1,2-dideoxy- $\beta$ -1-(3,5-dimethylphenyl)-D-ribofuranose (1e, 69% isolated yield)**

$^1\text{H}$  NMR (1:1  $\text{CDCl}_3/\text{CD}_3\text{OD}$ )  $\delta$  6.98 (s, 2H), 6.91 (s, 1H), 5.08 (dd, 1H, H-1,  $J = 10.4, 5.4$  Hz), 4.34-4.32 (m, 1H, H-3), 3.96 (app dt, 1H,  $J = 2.7, 5.3$  Hz, H-4), 3.72 & 3.67 (AB part of ABX, 2H,  $J_{AB} = 11.6$  Hz,  $J_{AX} = 5.2$  Hz,  $J_{BX} = 5.4$  Hz, H-5), 2.30 (s, 6H,  $2 \times \text{CH}_3$ ), 2.18 (ddd, 1H,  $J =$

13.2, 5.4, 1.6 Hz, H-2), 1.98 (ddd, 1H,  $J = 13.2, 10.5, 6.0$  Hz, H-2).  $^{13}\text{C}$  NMR (1:1  $\text{CDCl}_3/\text{CD}_3\text{OD}$ )  $\delta$  140.8, 137.3, 128.7, 123.3, 87.1, 79.8, 72.6, 62.5, 42.9, 20.3. HRMS: Calcd for  $\text{C}_{13}\text{H}_{18}\text{O}_3$   $m/z$  222.1256, found  $m/z$  222.1234.

**1,2-dideoxy- $\beta$ -1-(2-naphthyl)-D-ribofuranose (1f, 76% isolated yield)<sup>2</sup>**

$^1\text{H}$  NMR (1:1  $\text{CDCl}_3/\text{CD}_3\text{OD}$ )  $\delta$  7.84-7.82 (m, 4H), 7.51-7.45 (m, 3H), 5.32 (dd, 1H,  $J = 10.2, 5.4$  Hz, H-1), 4.40-4.38 (m, 1H, H-3), 4.04-3.98 (m, 1H, H-4), 3.77-3.72 (m, 2H, H-5), 2.31 (br dd, 1H,  $J = 13.0, 5.2$  Hz, H-2), 2.09 (ddd, 1H,  $J = 13.0, 10.5, 6.0$  Hz, H-2).  $^{13}\text{C}$  NMR (1:1  $\text{CDCl}_3/\text{CD}_3\text{OD}$ )  $\delta$  138.5, 132.8, 132.6, 127.6, 127.3, 127.0, 125.5, 125.2, 124.2, 123.5, 87.3, 79.9, 72.67, 62.5, 43.0. HRMS: Calcd for  $\text{C}_{15}\text{H}_{16}\text{O}_3$   $m/z$  244.1099, found  $m/z$  244.1103.

**1,2-dideoxy- $\beta$ -1-(1-naphthyl)-D-ribofuranose (1g, 69% isolated yield)<sup>2</sup>**

$^1\text{H}$  NMR (1:1  $\text{CDCl}_3/\text{CD}_3\text{OD}$ )  $\delta$  8.06 (d, 1H,  $J = 7.6$  Hz), 7.88-7.85 (m, 1H), 7.78 (d, 1H,  $J = 8.2$  Hz), 7.74 (d, 1H,  $J = 7.0$  Hz), 7.56-7.44 (m, 3H), 5.91 (dd, 1H,  $J = 10.1, 5.6$  Hz, H-1), 4.40-4.37 (m, 1H, H-3), 4.11-4.07 (m, 1H, H-4), 3.81 & 3.76 (AB part of ABX, 2H,  $J_{AB} = 11.6$  Hz,  $J_{AX} = 5.3$  Hz,  $J_{BX} = 5.1$  Hz, H-5), 2.51 (ddd, 1H,  $J = 13.2, 5.6, 2.0$  Hz, H-2), 2.05 (ddd, 1H,  $J = 13.2, 10.2, 6.2$  Hz, H-2).  $^{13}\text{C}$  NMR (1:1  $\text{CDCl}_3/\text{CD}_3\text{OD}$ )  $\delta$  137.0, 133.2, 130.1, 128.1, 127.2, 125.4, 124.9, 122.5, 121.4, 86.8, 76.5, 72.5, 62.4, 42.1. HRMS: Calcd for  $\text{C}_{15}\text{H}_{16}\text{O}_3$   $m/z$  244.1099, found  $m/z$  244.1085.

**References**

- (1) Millican, T. A.; Mock, G. A.; Chauncey, M. A.; Patel, T. P.; Eaton, M. A. W.; Gunning, J.; Cutbush, S. D.; Neidle, S.; Mann, J. *Nucleic Acids Res.* **1984**, *12*, 7435.
- (2) Ren, R. X.-F.; Chaudhuri, N. C.; Paris, P. L.; Rumney, S.; Kool, E. T. *J. Am. Chem. Soc.* **1996**, *118*, 7671.
